# Supplementary material
Source: PubMed Central journal article supplement (PMC4096338)
Supplement: NIHMS596884-supplement-Supplementary_Figures.pdf [file NIHMS596884-supplement-Supplementary_Figures.pdf]

# Supplementary Figure 1-Dr. Yang

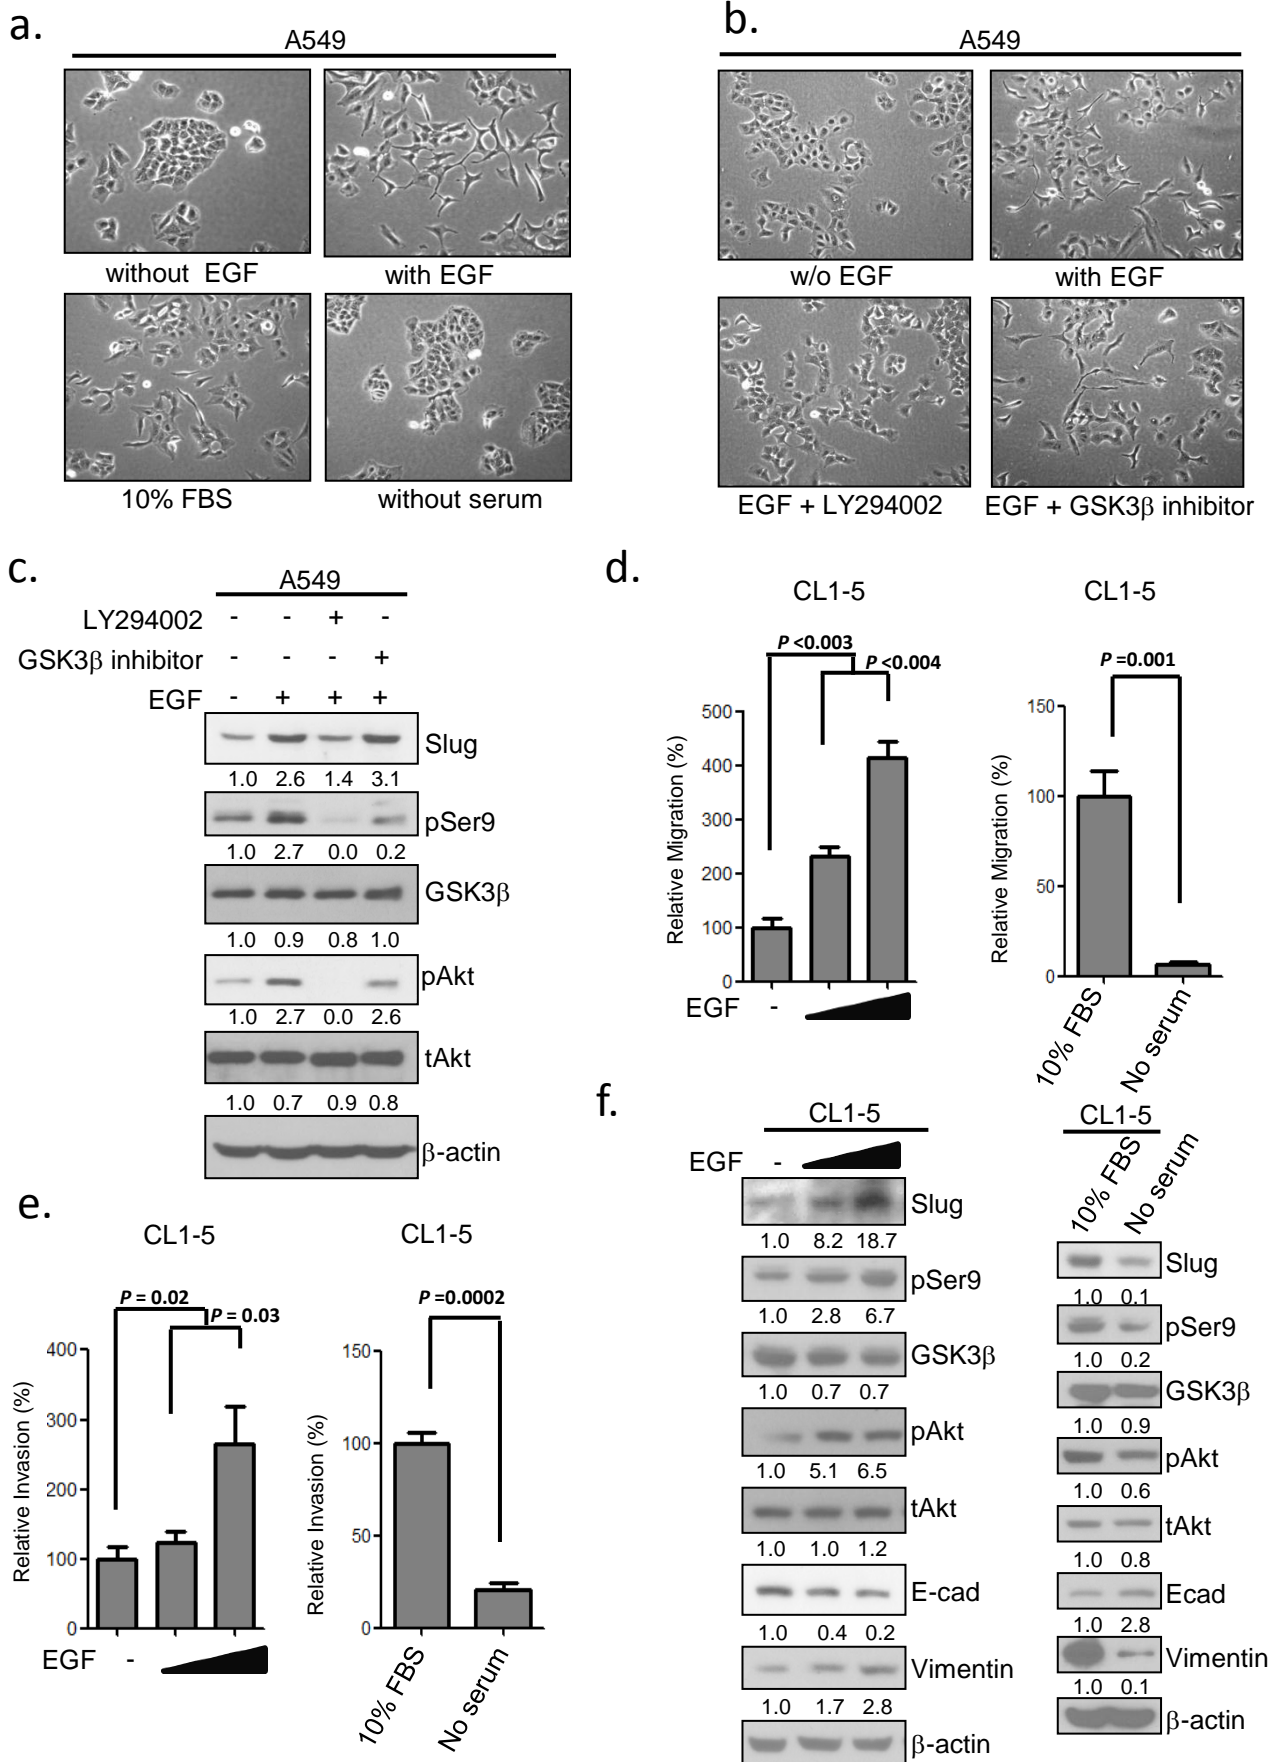

# Supplementary Figure 2-Dr. Yang

a.

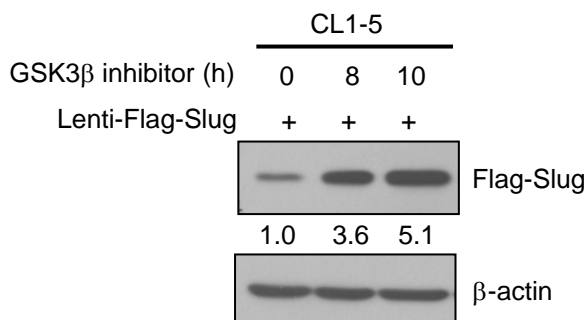

b.

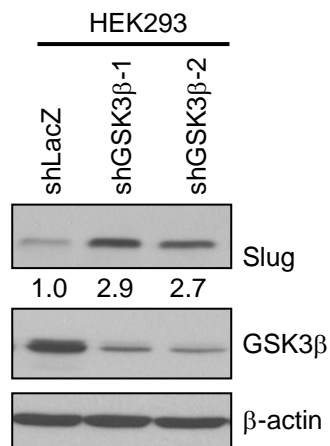

c.

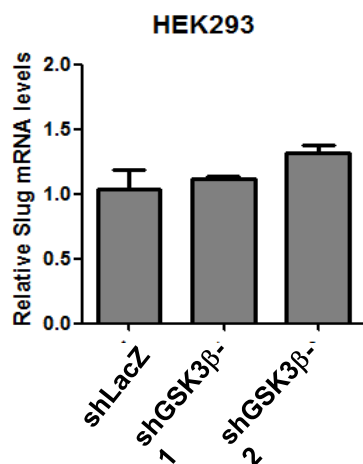

d.

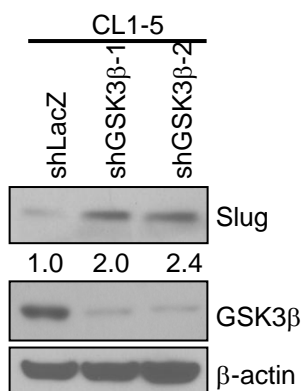

e.

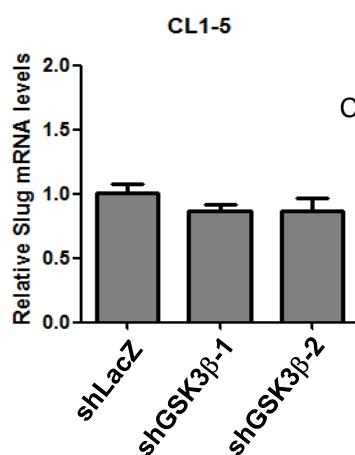

f.

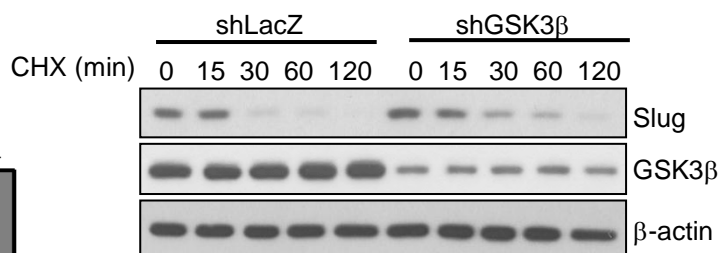

g.

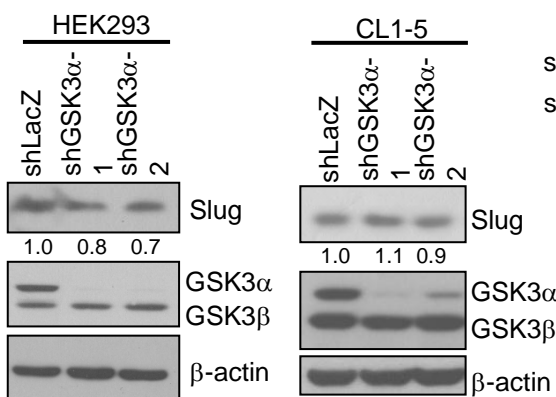

h.

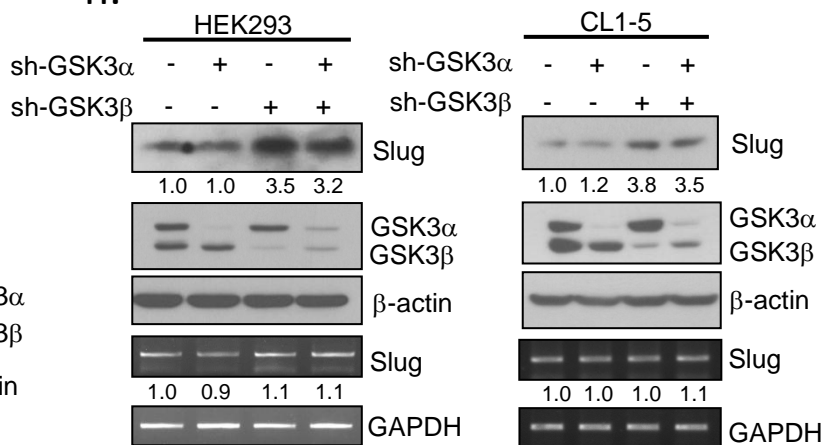

i.

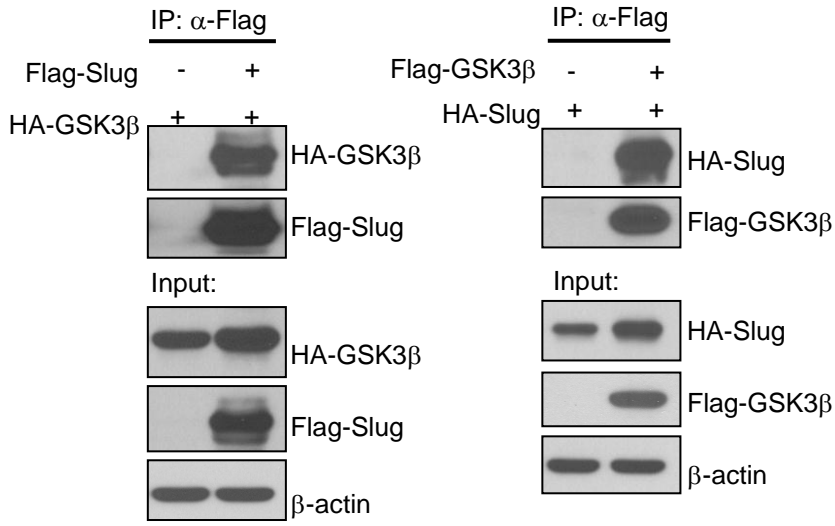

j.

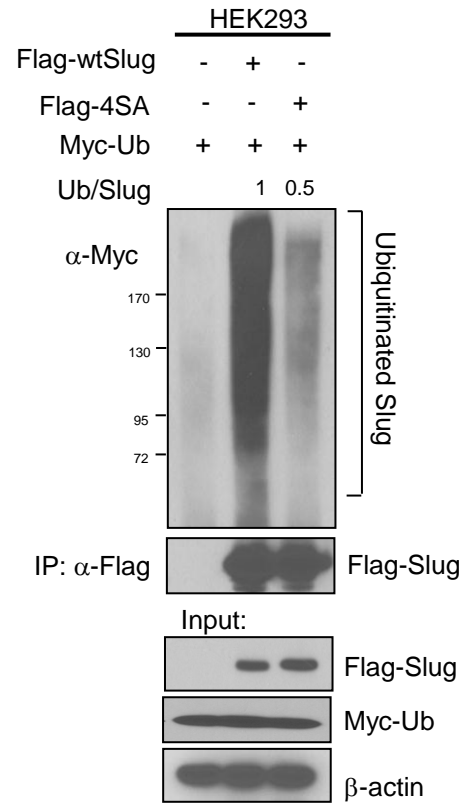

# Supplementary Figure 3-Dr. Yang

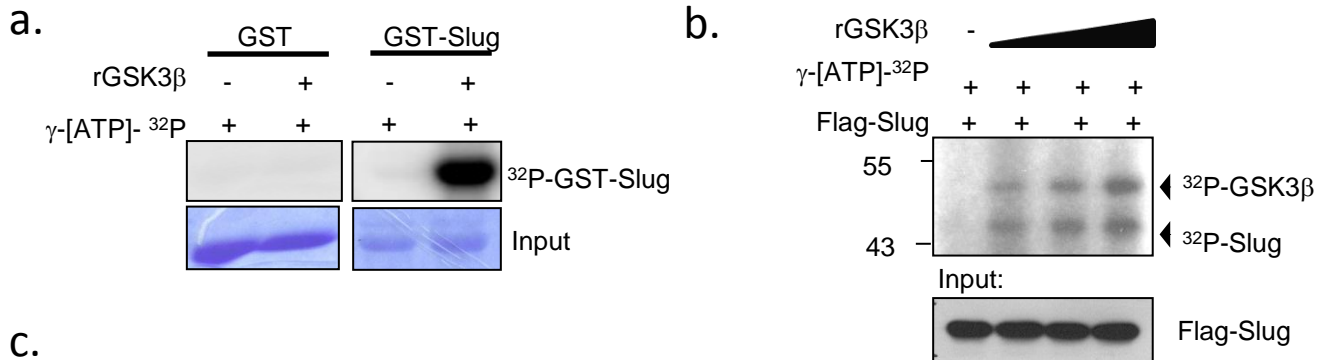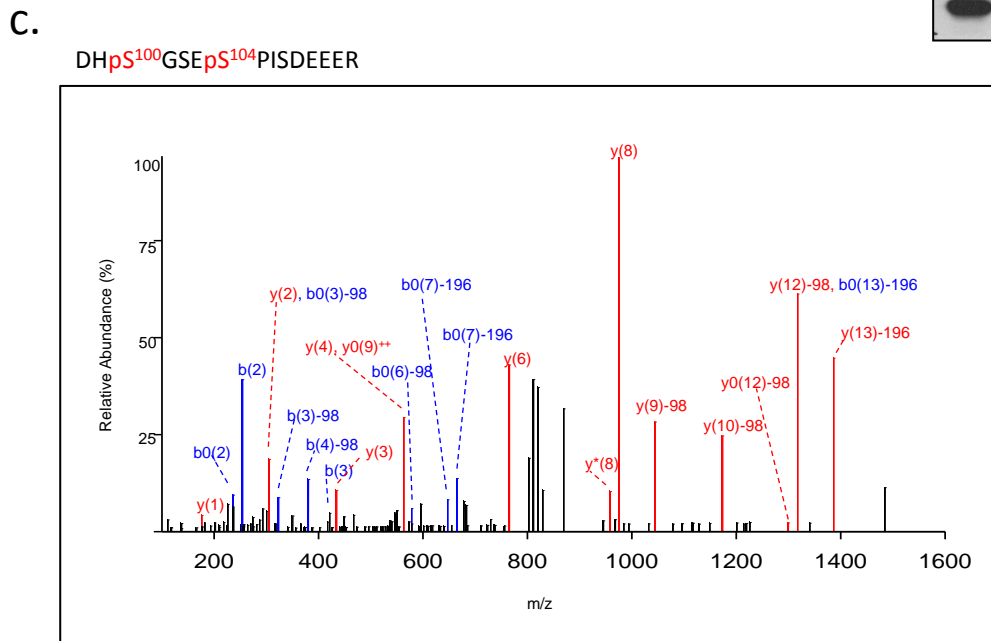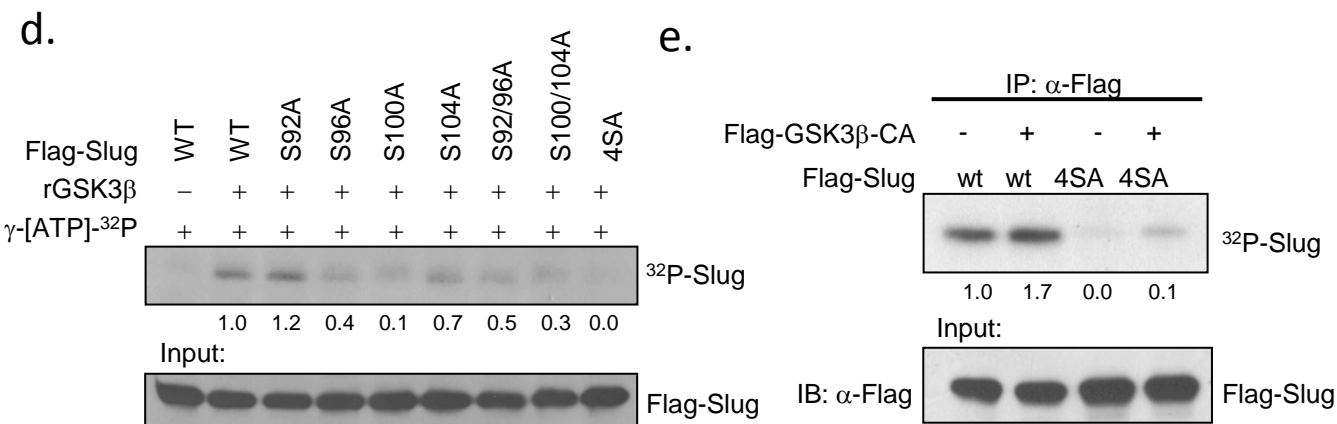

# Supplementary Figure 4-Dr. Yang

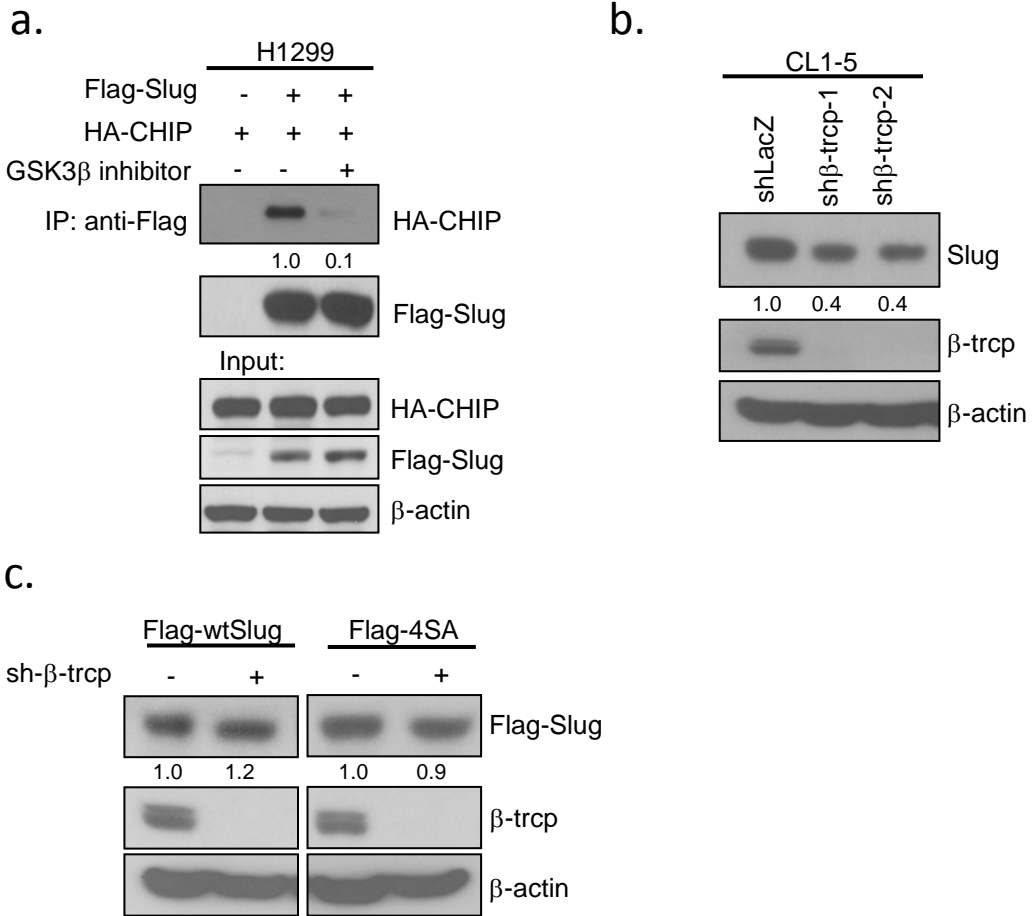

# Supplementary Figure 5-Dr. Yang

a.

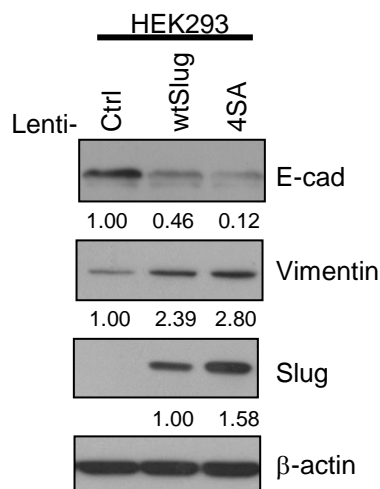

b.

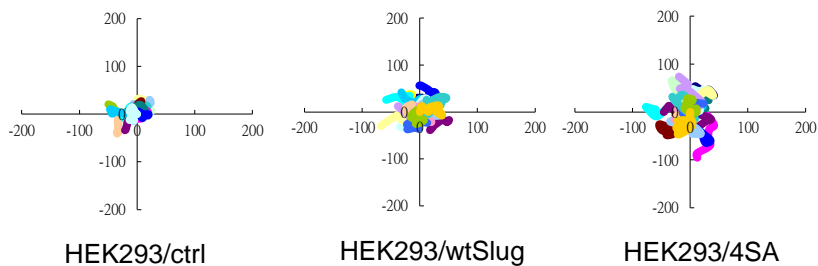

d.

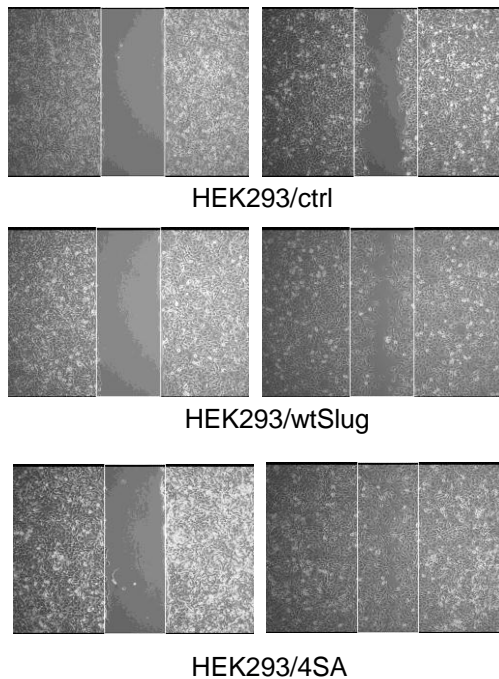

c.

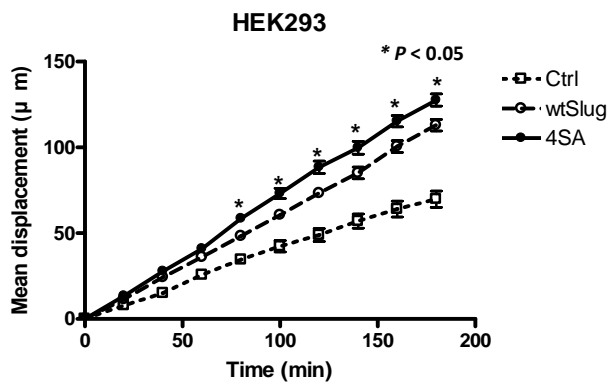

e.

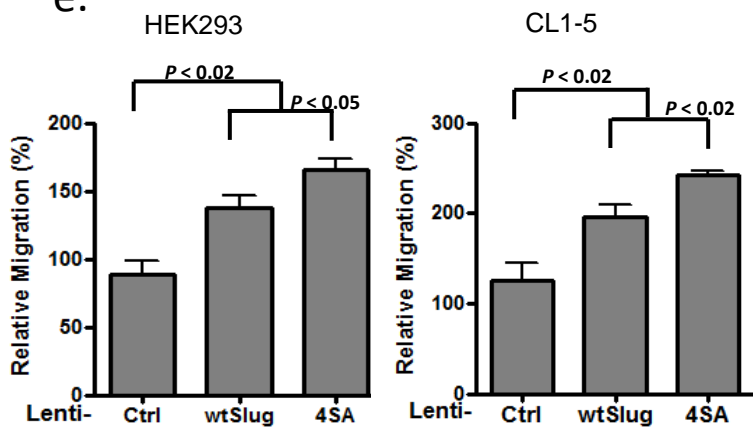

# Kao., et al. Supplementary 6

a.

CHIP

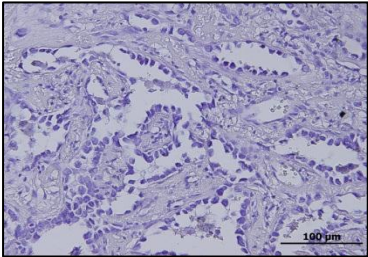

Negative staining

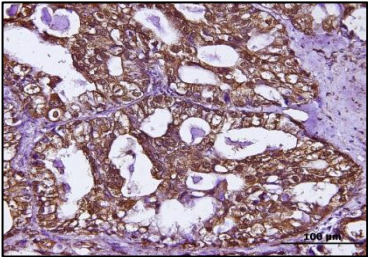

Positive staining

# Table S2-Dr. Yang

| Expression Pattern | GSK3b-pSer9 | Slug overexpression | CHIP overexpression | Total (%) |
|--------------------|-------------|---------------------|---------------------|-----------|
| 1                  | +           | +                   | +                   | 13 (25)   |
| 2                  | +           | +                   | -                   | 0 (0)     |
| 3                  | +           | -                   | +                   | 14 (26.9) |
| 4                  | +           | -                   | -                   | 1 (1.92)  |
| 5                  | -           | +                   | +                   | 1 (1.92)  |
| 6                  | -           | +                   | -                   | 3 (5.77)  |
| 7                  | -           | -                   | +                   | 12 (23.1) |
| 8                  | -           | -                   | -                   | 8 (15.4)  |
| Total              |             |                     |                     | 52 (100)  |

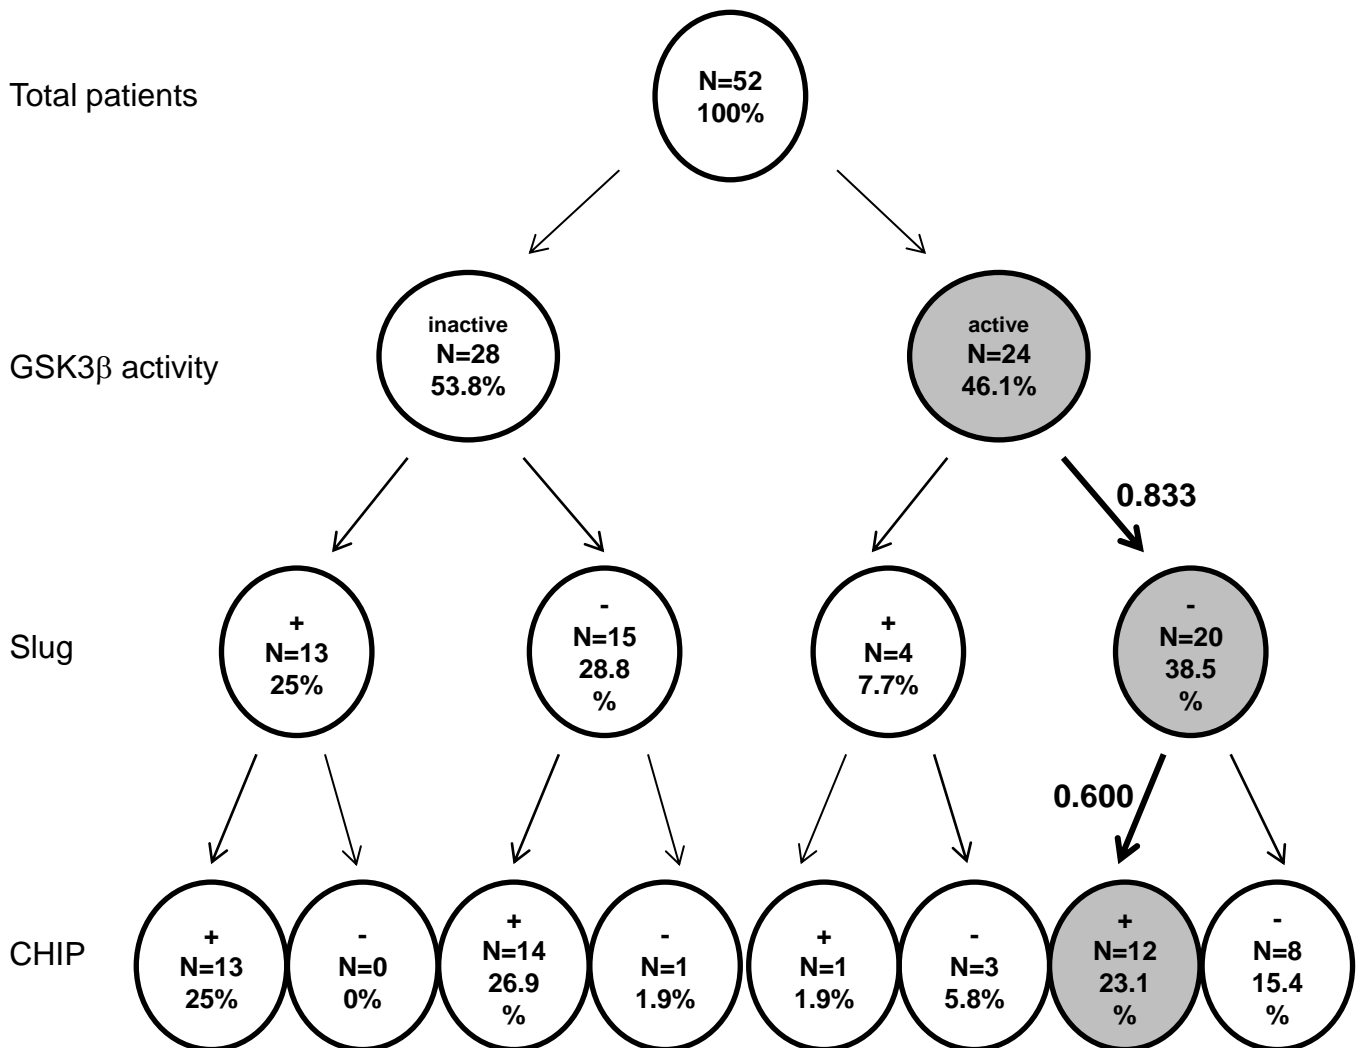



# Table S1-Dr. Yang

| Characteristics | Patient No. | Slug expression |            | P-value* | p-GSK3 $\beta$ expression |            | P-value* |
|-----------------|-------------|-----------------|------------|----------|---------------------------|------------|----------|
|                 |             | Low             | High       |          | Low                       | High       |          |
| Patient Number  | 52          | 35 (67.3%)      | 17 (32.7%) |          | 24 (46.2%)                | 28 (53.8%) |          |
| Sex             |             |                 |            |          |                           |            |          |
| Male            | 22          | 13 (59.1%)      | 9 (40.9%)  |          | 11 (50.0%)                | 11 (50.0%) |          |
| Female          | 30          | 22 (73.3%)      | 8 (26.7%)  | 0.2794   | 13 (43.3%)                | 17 (56.7%) | 0.6338   |
| Age (years)     |             |                 |            |          |                           |            |          |
| $\leq 60$       | 16          | 9 (56.3%)       | 7 (43.8%)  |          | 9 (56.3%)                 | 7 (43.8%)  |          |
| $>60$           | 36          | 26 (72.2%)      | 10 (27.8%) | 0.2571   | 15 (41.7%)                | 21 (58.3%) | 0.3303   |
| Tumor Stage     |             |                 |            |          |                           |            |          |
| Stage I         | 36          | 28 (77.8%)      | 8 (22.2%)  |          | 18 (50.0%)                | 18 (50.0%) |          |
| Stage II-IV     | 16          | 7 (43.8%)       | 9 (56.3%)  | 0.0158   | 6 (37.5%)                 | 10 (62.5%) | 0.4040   |
| Tumor size      |             |                 |            |          |                           |            |          |
| $\leq 3$ cm     | 19          | 15 (78.9%)      | 4 (21.10%) |          | 9 (47.4%)                 | 10 (52.6%) |          |
| $> 3$ cm        | 33          | 20 (60.6%)      | 13 (39.4%) | 0.1746   | 15 (45.5%)                | 18 (54.5%) | 0.8939   |

\*Pearson Chi-Square test.
